# Supplementary material for: Timing of seasonal influenza epidemics for 25 countries in Africa during 2010–19: a retrospective analysis
Source: PubMed Central journal article supplement — Lancet Glob Health. 2023 Apr 14;11(5):e729–39. doi: 10.1016/S2214-109X(23)00109-2 (PMC10126228; doi:10.1016/s2214-109x(23)00109-2), 2023-04-14
Supplement: mmc1.pdf [file mmc1.pdf]

# THE LANCET

## Global Health

### Supplementary appendix 1

This translation in Berber was submitted by the authors and we reproduce it as supplied. It has not been peer reviewed. The Lancet's editorial processes have only been applied to the original in English, which should serve as reference for this manuscript.

Supplement to: Igboh LS, Roguski K, Marcenac P, et al. Timing of seasonal influenza epidemics for 25 countries in Africa during 2010–19: a retrospective analysis. *Lancet Glob Health* 2023; **11**: e729–39.
