# Supplementary material for: Timing of seasonal influenza epidemics for 25 countries in Africa during 2010–19: a retrospective analysis
Source: PubMed Central journal article supplement — Lancet Glob Health. 2023 Apr 14;11(5):e729–39. doi: 10.1016/S2214-109X(23)00109-2 (PMC10126228; doi:10.1016/s2214-109x(23)00109-2), 2023-04-14
Supplement: mmc2.pdf [file mmc2.pdf]

# THE LANCET

## Global Health

### Supplementary appendix 2

This translation in Luganda was submitted by the authors and we reproduce it as supplied. It has not been peer reviewed. The Lancet's editorial processes have only been applied to the original in English, which should serve as reference for this manuscript.

Ekiwandiiko kino ekikyuse mu lulimi Oluganda kyaweereddwayo abawandiisi b'ennyini era tukifulumizza nga bwe baakituwadde. Tekinnakubaganyizibwako birowoozo abakugu abalala. Okusunsula kwa Lancet kukoleddwa ku ekyo eky'Olungereza kyokka nga bwe kyafulumizibwa era kye kirina okujulizibwako ku kiwandiiko kino."

Supplement to: Igboh LS, Roguski K, Marcenac P, et al. Timing of seasonal influenza epidemics for 25 countries in Africa during 2010–19: a retrospective analysis. *Lancet Glob Health* 2023; **11**: e729–39.

## **Ekiwandiiko Mu bufuunze**

**Ensibuko** Ebyafaayo nga tukozesa obubaka okuva mu mawanga ag'ebjawulo okulambulula emirimu egikolebwa ku kilwadde kya senyiga omukambwe, tusobola okutegeezebwa ku kusalawo ku biseera by'okugema obulwadde bwa senyiga omukambwe. Twekenneenya obubaka obwanoonyezezebwa okuva mu mawanga ag'enjawulo aga Afirika okusobola okwetegekera ebiseera bya senyigga omukambwe n'okutegeezebwa ku bukodyo bwokukozesa mu kugema. Twakozesa obubaka obwaliwo mubujjuvu okuva mu mawanga agakola alipoota negagiwa Global Influenza Surveillance wamu ne Response (GISRS) network mu myaka 3-10, obubaka obwakunganyizibwa mu 2010-2019.

**Enkola** Twakola okubalirira mu wiiki 3 ku bubonero obulaga senyiga omukambwe nga bitambula bulungi netwekenneenya ebiseera ekirwadde nga tukozesa enkola ensamusamu. Entandikwa n'enkomerero ya buli kirwadde yamanyikibwa mu wiiki esooka omuwendo bwegwali negunasukka oba nga gugenze wansi mu mwaka gwonna  $\geq$ okumala ebbanga lya wiiki 3. Twasengeka amawanga mu nkola y'ebirwadde eby'enjawulo bitaano. Mu bukiikakkono(NH) ebirwadde ebyaliwo mu October-March, mubugwanjuba(SH) ebirwadde ebyaliwo mu April-September, Okusingira ddala NH n'emirimu emitonotono mu myezi gya SH, okusingira ddala SH n'emirimu emitonotono mu myezi gya NH, okwtoolola omwaka gwona, okusaasanya senyiga omukambwe okutaategerekeka okusingira ddala mu NH oba SH.

**Ebyazuulibwa** okunoonyereza ku bituundu amakumi abiri mu bitaano (74%) ku mawanga 34 aga GISRS gaalina kitono ddala mu myaka  $\geq$ 3 bwiino bweyafunibwa, okukiikirira amawanga 46% mu Afirika ne 89% ku bungi bw'abantu abali mu Afirika. Mu myaka bwiino bweyafunibwa, waliyo ebilwadde 248 okwetoolola amawanga 236. (Okugeraageranya ne 10; no'muwendo oguli wakati wa 7–10 buli ggwanga). Amawanga mukaaga (24%) baalina ekyokulabilako ekya NH (Algeria, Egypt, Tunisia, Burkina Faso, Niger ne Morocco). Munaana ku (32%) baalina ekyokulabirako kinene mu NH n'ebilwadde ebimu mu SH (Cameroon, Ethiopia, Mali, Nigeria, Senegal, Togo, Tanzania, ne Mozambique). Ssatu ku (12%) baalina ekyokulabirako kinene mu SH n'ebilwadde ebimu mu NH (Ghana, Kenya, ne Uganda). Ssatu ku (12%) baalina ekyokulabirako mu SH (Central African Republic, Zambia, ne South Africa). Taano ku (20%) baalina NH oba SH okusingira ddala (Cote D'Ivoire, Democratic Republic of Congo, Rwanda, Madagascar ne Mauritius).

**Okutangaaza** Ekivvuunulwa kiri nti amawanga agasinga gaalina ebiseera by'obulwadde ebyali bimanyikiddwa okutegeeza abobuyinza, ku mirimu egikolebwa mu biseera nga obulwadde buno webuli, ne mu biseera nga tebuliwso, okugoberera okugemebwa mu budde, nekutumbula engeli y'okwenyigira mu nsonga zino.

**Omuvvujirizi** Tewali noomu
