# Supplementary material for: Timing of seasonal influenza epidemics for 25 countries in Africa during 2010–19: a retrospective analysis
Source: PubMed Central journal article supplement — Lancet Glob Health. 2023 Apr 14;11(5):e729–39. doi: 10.1016/S2214-109X(23)00109-2 (PMC10126228; doi:10.1016/s2214-109x(23)00109-2), 2023-04-14
Supplement: mmc4.pdf [file mmc4.pdf]

# THE LANCET

## Global Health

### Supplementary appendix 4

This translation in Chewa was submitted by the authors and we reproduce it as supplied. It has not been peer reviewed. *The Lancet's* editorial processes have only been applied to the original in English, which should serve as reference for this manuscript.

Kutanthauzila kwa mu Chichewa uku kwachokela kwa alembi a nkhanayi ndipo tayipeleka kwa inu m'mene tinayilandilila. Mawu a mu Chichewa sanawunikidwense kapena kukonzedwa. Nkhani ya mu Chingelezi yokha ndi imene yadutsa mu ukonzi wa Lancet, kotelo kuti nkhanayi ya mu Chingeleziyi ndi imene ikuyimilila mokwanila nkhanayi yonse imene yalembedwa.

Supplement to: Igboh LS, Roguski K, Marcenac P, et al. Timing of seasonal influenza epidemics for 25 countries in Africa during 2010–19: a retrospective analysis. *Lancet Glob Health* 2023; **11**: e729–39.

## **Chidule cha Zolemba**

**Zambuyo** Kugwiritsa ntchito deta yeniyeni yowunikira dziko anaziika kufotokoza ntchito ya mliri wa chimfine cha fuluwenza kungathandize kupanga zisankho za nthawi yoperekerwa katemera wa chimfine. Tidasanthula deta ya zomwe zidachitika m'maiko aku Africa kuti tidziwe nthawi ya mliri wa chimfine cha fuluwenza kuti tidziwe njira zopezera katemera wa dziko. Tidagwiritsa ntchito deta ya alonda yopezeka poyera yochokera kumayiko omwe akupereka malipoti ku netiweki ya Global Influenza Surveillance and Response (GISRS) yokhala ndi zaka zitatu mpaka khumi za data yomwe idasonkhanitsidwa mkati mwa 2010-2019.

**Njira** Tinawerengera kusuntha kwa masabata atatu a kuchuluka kwa zopima zomwe zinali ndi kachilombo ka fuluwenza ndikuwunika nthawi ya mliri pogwiritsa ntchito njira yophatikizira.. Kuyamba ndi kutha kwa mliri uliwonse kumatanthauzidwa ngati sabata yoyamba pamene chiwerengerocho chinapitirira kapena chinapita pansu pa chiwerengero cha pachaka, motero, kwa  $\geq$ masabata atatu otsatizana. Tidagawa mayiko m'magulu asanu a mliri: Miliri ya Northern Hemisphere (NH) yomwe imachitika kuambira mu Okutobala mpaka Malichi, ku Southern Hemisphere (SH) yomwe imachitika kuyambira Epulo mpaka Seputembala, choyambirira NH yokhala ndi miliri m'miyezi ya SH, choyambirira SH yokhala ndi miliri m'miyezi ya NH, komanso kufalitsa chimfine cha fuluwenza chaka chonse popanda kuzindikira kuchuluka kwa NH kapena SH.

**Zotsatira** Mayiko makumi awiri ndi asanu (74%) a 34 GISRS anali ndi deta ya zaka  $\geq 3$ , yomwe ikuyimira 46% ya mayiko a Africa, ndi 89% ya anthu a ku Africa. Panali miliri 248 m'zaka za mayiko 236 za data (zapakati: 10; osiyanasiyana: 7-10 pa dziko lililonse). Mayiko asanu ndi limodzi (24%) anali ndi mtundu wa NH (Algeria, Egypt, Tunisia, Burkina Faso, Niger, ndi Morocco). Mayiko asanu ndi atatu (32%) anali ndi mtundu wa NH ndi miliri ya SH (Cameroon, Ethiopia, Mali, Nigeria, Senegal, Togo, Tanzania, ndi Mozambique). Mayiko atatu (12%) anali ndi mtundu wa SH wokhala ndi miliri ya NH (Ghana, Kenya, ndi Uganda). Mayiko atatu (12%) anali ndi mtundu wa SH (Central African Republic, Zambia, ndi South Africa). Mayiko asanu (20%) analibe kuchuluka kwa NH kapena SH (Cote D'Ivoire, Democratic Republic of Congo, Rwanda, Madagascar, ndi Mauritius).

**Kutanthauzira** Mayiko ambiri anali ndi nthawi zodziwika bwino za chimfine cha fuluwenza kuti akuluakulu adziwe za zochitika za chimfine zomwe sizichitika mu nyengo ndi nyengo, kuwongolera nthawi ya katemera, komanso kulimbikitsa njira zothandizira panthawi yake.

## **Thandizo laNdalama Palibe**
