# Supplementary material for: Timing of seasonal influenza epidemics for 25 countries in Africa during 2010–19: a retrospective analysis
Source: PubMed Central journal article supplement — Lancet Glob Health. 2023 Apr 14;11(5):e729–39. doi: 10.1016/S2214-109X(23)00109-2 (PMC10126228; doi:10.1016/s2214-109x(23)00109-2), 2023-04-14
Supplement: mmc5.pdf [file mmc5.pdf]

# THE LANCET

## Global Health

### Supplementary appendix 5

This translation in Yoruba was submitted by the authors and we reproduce it as supplied. It has not been peer reviewed. *The Lancet's* editorial processes have only been applied to the original in English, which should serve as reference for this manuscript.

Ìtumò èdè Yorùbá ni àwọn òhàkòwé ti fi sílẹ̀, a sì tún ẹ̀ bí a ẹ̀ pèsè rẹ̀. Ko ẹ̀ atunyẹ̀wo ẹ̀lẹ̀gbẹ̀. Awọn ilana ọ̀satunṣe Lancet ti jẹ̀ lilo si atilẹ̀ba nikan ni Gẹ̀ẹ̀si, eyiti o yẹ̀ ki o jẹ̀ itọ̀kasi fun iwe afọ̀wọ̀kọ̀ yii.

Supplement to: Igboh LS, Roguski K, Marcenac P, et al. Timing of seasonal influenza epidemics for 25 countries in Africa during 2010–19: a retrospective analysis. *Lancet Glob Health* 2023; **11**: e729–39.

## **Abala Afoyemọ**

**Ọrọ Akọsọ** Lilo akojọ-fayẹwo iwakiri ti pato orilẹ-ede lati se apejuwe isẹ ajakale-arun ayọkẹlẹ le sọ awọn ipinnu nipa akoko fun abẹrẹ ajesara aarun ayọkẹlẹ. A se atupale akojọ-fayẹwo iwakiri lati awọn orilẹ-ede Afirika lati se afihan akoko ti awọn ajakale-arun ayọkẹlẹ akoko lati se itọni fun awọn ilana abẹrẹ ajesara orilẹ-ede. A lo akojọ-fayẹwo sentinel ti o wa ni arọwọto awujọ lati awọn orilẹ-ede ti n se ijabọ si Global Influenza Surveillance and Response (GISRS) pẹlu awọn ọdun 3 si 10 ti akojọ-fayẹwo ti a gba l'akoko ọdun 2010 si 2019.

**Awọn ọna ise** A se işiro isikiri didara ọlọşẹ 3 ti ipin ti awọn ayẹwo ti o daadaa fun ọlọşẹ aarun ayọkẹlẹ ati işiro akoko ajakale-arun nipa lilo ọna apapọ iwontunwonsi. Awọn ibẹrẹ ati ipari ti ajakale-arun kọọkan ni a salaye gẹgẹbi ọşẹ akọkọ nigbati ipin naa ba ti kọja tabi lọ si isalẹ aropin ọdọdun, ni sişentẹle, fun ọşẹ  $\geq 3$  tabi ju bẹẹlọ to tẹlera. A pin awọn orilẹ-ede si awọn ọna ajakale-arun marun: Ẽya-Aye Àríríwá (NH) ajakale ti o waye ni Oşu Kẹwa-Oşu Kẹta, Ẽya-Aye Iwo-oorun (SH) ti o waye ni Oşu Kẹrin-Oşu Kẹsan, nipataki NH pẹlu diẹ ninu işẹlẹ ajakale-arun ni awọn oşu SH, nipataki SH pẹlu diẹ ninu işẹ ajakale-arun ni awọn oşu NH, ati gbigebe aarun ayọkẹlẹ ni gbogbo ọdun laisi akiyesi NH tabi SH ijegàba.

**Awọn awari** Mèèédógbòn (74%) ti awọn orilẹ-ede 34 GISRS ni akojọ-fayẹwo ọdun 3 tabi keere ju bẹ, ti o nsoju 46% awọn orilẹ-ede ni Afirika, ati 89% ti olugbe Afirika. Awọn ajakale-arun 248 wa kọja awọn ọdun orilẹ-ede 236 ti akojọ-fayẹwo (agbedemeji: 10; bi ọşẹ gun: 7–10 fun orilẹ-ede kan). Awọn orilẹ-ede mefa (24%) ni ilana NH (Algeria, Egypt, Tunisia, Burkina Faso, Niger, ati Morocco). Mejo (32%) ni apẹrẹ NH akọkọ pẹlu diẹ ninu awọn ajakale-arun SH (Cameroon, Ethiopia, Mali, Nigeria, Senegal, Togo, Tanzania, ati Mozambique). Meṭa (12%) ni ilana SH akọkọ pẹlu diẹ ninu awọn ajakale-arun NH (Ghana, Kenya, ati Uganda). Meṭa (12%) ni apẹrẹ SH (Central African Republic, Zambia, ati South Africa). Marun (20%) ko ni ipo NH tabi SH ijegàba (Cote D'Ivoire, Democratic Republic of Congo, Rwanda, Madagascar, ati Mauritius).

**Itumọ** Ọpọ awọn orilẹ-ede ni awọn akoko ajakale-arun ayọkẹlẹ ti o şe damọ lati sọ fun awọn alaşe ti işẹ aarun igba ti kii şe asiko ati akoko, itọşona akoko ajesara, ati igbega awọn ilowosi akoko.

**Isonigbọwo** Ko si
