# Supplementary material for: Timing of seasonal influenza epidemics for 25 countries in Africa during 2010–19: a retrospective analysis
Source: PubMed Central journal article supplement — Lancet Glob Health. 2023 Apr 14;11(5):e729–39. doi: 10.1016/S2214-109X(23)00109-2 (PMC10126228; doi:10.1016/s2214-109x(23)00109-2), 2023-04-14
Supplement: mmc6.pdf [file mmc6.pdf]

# THE LANCET

## Global Health

### Supplementary appendix 6

This translation in Igbo was submitted by the authors and we reproduce it as supplied. It has not been peer reviewed. The Lancet's editorial processes have only been applied to the original in English, which should serve as reference for this manuscript.

Supplement to: Igboh LS, Roguski K, Marcenac P, et al. Timing of seasonal influenza epidemics for 25 countries in Africa during 2010–19: a retrospective analysis. *Lancet Glob Health* 2023; **11**: e729–39.

## **Umi edemede ihe odide**

**Mgbakwasa-ukwu** Iji data onyonyo obodo kpomkwem wee kwaa omume ntiwapu orja influenza nwere ike inye aka na ime mkpebi banyere oge igba ogwu mgbochi maka orja influenza Anyi nyochara data onyonyo sitere na mba Afrika iji mara oge ntiwapu orja influenza iji nye aka n'imebe usoro igba ogwu mgbochi orja na mba. Anyi ji data sentinel di n'ihu oha nke sitere na mba ndi na-eme mkpesa na netwok nke Global Influenza Surveillance and Response (GISRS) nke nwere data afọ 3-10 nke anakotara n'oge 2010-2019.

**Usoro** Anyi gbakotara izu-uka 3 ziri ezi na-agaghari agaghari nke nha nke ihe nlele di mma maka nje influenza ma nyochaa oge ntiwapu orja na-eefe efe site na iji usoro nchikota mkpokota.. Mbido na njedebe kwa oge ntiwapu orja na-eefe efe bu ihe akwara dika izu-uka mbu n'oge nha gafere ma o bu gbadara n'uzo di ala kwa afọ, n'otu n'otu, maka zizu-uka 3 nke na-esochi. Anyi kewaputara mba n'ime usoro ntiwapu orja na-eefe efe ise: Ntiwapu orja na-eefe efe nke Northern Hemisphere (NH) na-eme n'onwa Oktoba-Mach, Southern Hemisphere (SH) na-eme n'onwa Eprel-Septemba, n'uzo bu isi NH nwere ufodu ntiwapu orja na-eefe efe n'ime onwa SH, n'uzo bu isi SH na ufodu ntiwapu orja na-eefe efe n'ime onwa NH, na mbufe nke orja influenza n'ime afọ na-enweghi ihe a na-ahu anya nke NH ma o bu putara ihe nke SH.

**Nchoputagasi** Iri abuo na ise (74%) nke mba 34 GISRS nwere data kariji ma o bu di nhata afọ 3, na anochiteanya 46% nke mba di na Afrika, yana 89% nke onu ogugu mmadu na Afrika. Enwere ntiwapu orja na-eefe efe 248 n'ofe data afọ 236 nke obodo (nke etiti: 10; ogbata: 7-10 kwa mba). Mba isii (24%) nwere ukpuru NH (Algeria, Egypt, Tunisia, Burkina Faso, Niger, na Morocco). Asato (32%) nwere ukpuru nke NH n'uzo bu isi ma nwee ufodu ntiwapu orja na-eefe efe nke SH (Cameroon, Ethiopia, Mali, Nigeria, Senegal, Togo, Tanzania, na Mozambique). Atọ (12%) nwere ukpuru nke SH n'uzo bu isi ma nwee ufodu ntiwapu orja na-eefe efe nke NH (Ghana, Kenya, na Uganda). Atọ (12%) nwere ukpuru nke SH (Central African Republic, Zambia, na South Africa). Ise (20%) enweghi NH ma o bu mputa ihe nke SH (Cote D'Ivoire, Democratic Republic of Congo, Rwanda, Madagascar, na Mauritius).

**Nkwa** Otutu mba nwere oge ntiwapu orja na-eefe efe nke orja influenza amatara maka iji gwa ndi ochichi maka omume orja influenza nke na-abughi n'oge yana nke bu n'oge mbufe ya, na-eduzi oge igba ogwu mgbochi orja, ma kwalite mmemme ntinye aka n'oge.

**Nkwado ego** Onweghi
