# Supplementary material for: Timing of seasonal influenza epidemics for 25 countries in Africa during 2010–19: a retrospective analysis
Source: PubMed Central journal article supplement — Lancet Glob Health. 2023 Apr 14;11(5):e729–39. doi: 10.1016/S2214-109X(23)00109-2 (PMC10126228; doi:10.1016/s2214-109x(23)00109-2), 2023-04-14
Supplement: mmc8.pdf [file mmc8.pdf]

# THE LANCET

## Global Health

### Supplementary appendix 8

This translation in Afaan Oromo was submitted by the authors and we reproduce it as supplied. It has not been peer reviewed. *The Lancet's* editorial processes have only been applied to the original in English, which should serve as reference for this manuscript.

Hiikkaan Afaan Oromoon dhihaate kun barreessitoota qorannoo kanaan kan qophaa'ee fi qaama biraatiin kan hin gulaalamne dha. Sirna qopheessaa Laanseetiin kan gulaalame kan Afaan Ingliziin dhihaate qofa waan ta'eef maddi barreeffama kanaa akka isa ta'e hubachiisuu feena.

Supplement to: Igboh LS, Roguski K, Marcenac P, et al. Timing of seasonal influenza epidemics for 25 countries in Africa during 2010–19: a retrospective analysis. *Lancet Glob Health* 2023; **11**: e729–39.

## **Cuunfaa Barreeffama Hin Maxxanfame**

**Dugduubee** Sochii weerara influenzaa ibsuuf odeeffannoo hordoffii biyya tokkoo fayyadamuun yeroo talaalliin influenzaa itti kennamu murteessuuf odeeffannoo kennuudhaaf gargaaruu danda'a. Tarsiimoo talaallii biyyoolessaa murteessuuf akka gargaaruu yeroo weeraroota influenzaa yeroo yerootti mul'atan adda baasuuf odeeffannoo hordoffii biyyoota Afrikaa irraa argame xiinxalleerra. Biyyoota neetworkii Hordoffii fi Deebii Infuleenaa Addunyaa (GISRS)tti gabaasa dhiyeessan irraa daataa sentinel ummataaf ifa ta'e, kan waggoota 3–10 bara 2010–2019 keessatti walitti qabame fayyadamne.

**Mala** Pirooppoorshinii saamuda vaayirasii infuleenzaatiin pozaatiivii ta'e keessatti yeroo torban 3f pozaatiivii ta'e shallagnee mala giddugaleessaa walitti-qabaa fayyadamuun yeroo weerara kanaa tilmaamneerra. Jalqabni fi xumurri weerara tokkoo tokkoon isaa yeroo pirooppoorshiniin akkaataa wal duraa duubaan, torban  $\geq 3$  walitti aansuun giddugaleessa waggaa ol ykn gadi ta'e, torban jalqabaa jedhamee ibsameera. Biyyoota haala weerara shanitti ramadneerra: Weerarra Hemisfeera Kaabaa (NH) Onkoloolessa–Bitootessa kan mul'atu, Hemisfeera Kibbaa (SH) Ebla-Fulbaana kan mul'atu, irra caalaa NH ji'oota SH keessatti sochii weeraraa tokko tokko qabu, irra caalaa SH ji'oota NH keessatti sochii weeraraa tokko tokko qabu, fi daddarbiinsa infuleenaa waggaa guutuu kan ol'aantummaa adda baafamuu NH ykn SH hin qabne.

**Argannoowwan** Biyyoota GISRS 34 keessaa 25 (74%) daataa waggaa  $\geq 3$  kan qaban yoo ta'u, kunis biyyoota Afrikaa keessaa 46% fi baay'ina ummata Afrikaa keessaa 89% bakka bu'u. Daataa waggoota-biyyaa 236 keessatti, weerarra 248 mul'atee ture (giddugaleessa: 10; daangaa: biyya tokkoof 7–10) Biyyoonni jaha (24%) haala weerara NH qaban ture (Aljeeriyaa, Masrii, Tuuniiziyaa, Burkinaa Faasoo, Nijjarii fi Morookoo). Biyyoonni saddeet (32%) hala weerara SH tokko tokko waliin baay'inaan hala weerara NH qaban ture (Kaameeruun, Itoophiyaa, Maalii, Naayijeeriyaa, Senegaal, Toogoo, Taanzaaniyaa fi Moozaambiik). Biyyoonni sadii (12%) hala weerara NH tokko tokko waliin baay'inaan hala weerara SH qaban ture (Gaanaa, Keeniyaa fi Yugaandaa). Biyyoonni sadii (12%) hala weerara SH qaban ture (Rippabliika Afrikaa Giddu Galeessaa, Zaambiyaa fi Afrikaa Kibbaa). Shan (20%) ol'aantummaa NHs ta'e SH hin agarsiifne (Kot Divuwaar, Rippabiliika Dimookiraatawaa Koongoo, Ruwaandaa, Madagaskaar, fi Moorishiyas).

**Hiikkaa** Biyyoonni baay'een isaanii yeroo weerara infuleenaa adda baafamuu danda'u kan qaban yoo ta'u, kunis sochii infuleenaa waqtii fi waqtii ala ta'e aangawootaaf beeksisuu, yeroo talaallii qajeelchuu fi tarkaanfii yeroosaatti fudhatamu jajjabeessuu danda'a.

## **Deeggarsa maallaqaa Hin jiru**
